# Supplementary material
Source: PubMed Central journal article supplement (PMC7844698)
Supplement: jamaotolaryngolheadnecksurg-e205261-s001.pdf [file jamaotolaryngolheadnecksurg-e205261-s001.pdf]

## Supplementary Online Content

Lee JJ, Peterson AM, Embry TW, et al. Survival outcomes of de novo vs inverted papilloma-associated sinonasal squamous cell carcinoma: a meta-analysis. *JAMA Otolaryngol Head Neck Surg*. Published online January 28, 2021. doi:10.1001/jamaoto.2020.5261

**eTable.** Methodological Index for Nonrandomized Studies (MINORS) Criteria for Each Included Study

**eText.** Complete Search Strategy

**eFigure 1.** Forest Plot of the Meta-Analysis of 5-Year Disease-Free Survival Rates Between dnSCC and IPSCC

**eFigure 2.** Forest Plot of the Meta-Analysis of 5-Year Disease Specific Survival Rates Between dnSCC and IPSCC

**eFigure 3.** Forest Plot of the Meta-Analysis of 5-Year Overall Survival Rates Between dnSCC and IPSCC When Including Studies That Did Not Explicitly Mention IP Status Into the De Novo Group

**eFigure 4.** Forest Plot of the Meta-Analysis of 5-Year Disease-Free Survival Rates Between dnSCC and IPSCC When Including Studies That Did Not Explicitly Mention IP Status Into the De Novo Group

**eFigure 5.** Forest Plot of the Meta-Analysis of 5-Year Disease-Specific Survival Rates Between dnSCC and IPSCC When Including Studies That Did Not Explicitly Mention IP Status Into the De Novo Group

**eFigure 6.** Funnel Plot of the Included Studies in the Meta-Analysis With Logarithmic Function of the Hazard Ratio on the X-Axis and Standard Error on the Y-Axis

This supplementary material has been provided by the authors to give readers additional information about their work.

**eTable.** Methodological Index for Nonrandomized Studies (MINORS) Criteria for Each Included Study

| Study, Year                       | Clearly stated aim | Inclusion of consecutive patients | Prospective collection of data | Endpoints appropriate to the study aim | Unbiased assessment of study endpoints | Follow-up period appropriate to the study aim | Loss to follow up <5 % | Prospective calculation of study size | Additional criteria score for comparative studies | Total score |
|-----------------------------------|--------------------|-----------------------------------|--------------------------------|----------------------------------------|----------------------------------------|-----------------------------------------------|------------------------|---------------------------------------|---------------------------------------------------|-------------|
| <b>Direct Comparative Studies</b> |                    |                                   |                                |                                        |                                        |                                               |                        |                                       |                                                   |             |
| Lavertu P et al., 1989            | 2                  | 2                                 | 0                              | 2                                      | 2                                      | 1                                             | 1                      | 0                                     | 6                                                 | 16          |
| de Almeida JR et al., 2015        | 2                  | 2                                 | 0                              | 2                                      | 2                                      | 2                                             | 0                      | 1                                     | 6                                                 | 17          |
| Lobo BC et al., 2017              | 2                  | 2                                 | 1                              | 2                                      | 1                                      | 2                                             | 0                      | 0                                     | 6                                                 | 16          |
| Yan CH et al., 2017               | 2                  | 2                                 | 0                              | 2                                      | 2                                      | 2                                             | 2                      | 0                                     | 7                                                 | 19          |
| Yu MS et al., 2017                | 2                  | 2                                 | 0                              | 2                                      | 2                                      | 2                                             | 0                      | 0                                     | 7                                                 | 17          |
| <b>de novo Sinonasal SCC Only</b> |                    |                                   |                                |                                        |                                        |                                               |                        |                                       |                                                   |             |
| Haraguchi H, 1995                 | 2                  | 1                                 | 0                              | 2                                      | 1                                      | 1                                             | 0                      | 0                                     | 0                                                 | 7           |
| Dulguerov P et al., 2001          | 2                  | 2                                 | 0                              | 1                                      | 2                                      | 2                                             | 2                      | 0                                     | 0                                                 | 11          |
| Ganly I et al., 2005              | 2                  | 1                                 | 0                              | 2                                      | 2                                      | 1                                             | 1                      | 0                                     | 0                                                 | 9           |
| Lee CH et al., 2007               | 2                  | 2                                 | 0                              | 1                                      | 2                                      | 2                                             | 2                      | 0                                     | 0                                                 | 11          |
| McKay SP et al., 2007             | 2                  | 2                                 | 0                              | 2                                      | 2                                      | 2                                             | 2                      | 0                                     | 0                                                 | 12          |
| Nicolai P et al., 2008            | 2                  | 2                                 | 0                              | 1                                      | 2                                      | 1                                             | 2                      | 0                                     | 0                                                 | 10          |
| Mine S et al., 2011               | 2                  | 1                                 | 0                              | 1                                      | 2                                      | 2                                             | 1                      | 0                                     | 0                                                 | 9           |
| Russo AL et al., 2016             | 2                  | 2                                 | 0                              | 2                                      | 2                                      | 2                                             | 2                      | 0                                     | 0                                                 | 12          |
| Chowdhury NA                      | 2                  | 2                                 | 0                              | 2                                      | 2                                      | 0                                             | 1                      | 0                                     | 0                                                 | 9           |

|                                         |   |   |   |   |   |   |   |   |   |    |
|-----------------------------------------|---|---|---|---|---|---|---|---|---|----|
| et al.<br>2017                          |   |   |   |   |   |   |   |   |   |    |
| <b>IP-associated Sinonasal SCC only</b> |   |   |   |   |   |   |   |   |   |    |
| Hug EB<br>et al.,<br>1993               | 2 | 2 | 0 | 1 | 2 | 1 | 0 | 0 | 0 | 8  |
| Lesperance MM<br>et al.,<br>1995        | 2 | 2 | 0 | 2 | 2 | 2 | 2 | 0 | 0 | 12 |
| Buiet GM<br>et al., 2012                | 2 | 2 | 0 | 2 | 2 | 1 | 0 | 0 | 0 | 9  |
| Choi JW<br>et al., 2012                 | 2 | 2 | 0 | 2 | 1 | 2 | 2 | 0 | 0 | 11 |
| Kim KK<br>et al.,<br>2012               | 2 | 2 | 0 | 2 | 2 | 2 | 0 | 0 | 0 | 10 |
| Hong SL<br>et al., 2013                 | 2 | 2 | 0 | 1 | 2 | 2 | 1 | 0 | 0 | 10 |
| Yu HX<br>et al.,<br>2014                | 2 | 2 | 0 | 2 | 2 | 1 | 2 | 0 | 0 | 11 |
| Liang QZ<br>et al., 2015                | 2 | 2 | 0 | 2 | 2 | 2 | 0 | 0 | 0 | 10 |
| Karligkiotis A<br>et al., 2016          | 2 | 2 | 0 | 2 | 2 | 2 | 2 | 0 | 0 | 12 |
| Yasumatsu RN<br>et al.,<br>2017         | 2 | 2 | 0 | 2 | 0 | 2 | 2 | 0 | 0 | 10 |
| Li YW<br>et al.,<br>2019                | 2 | 2 | 0 | 2 | 2 | 2 | 1 | 0 | 0 | 11 |
| Li W<br>et al., 2020                    | 2 | 2 | 0 | 2 | 2 | 2 | 2 | 0 | 0 | 12 |

0 = not reported; 1 = reported but inadequate; 2 = reported and adequate.

## eText. Complete Search Strategy

### Ovid Medline

607 results on 06/18/19

22 results on 01/23/20 with limit to yr="2019 -Current"

(Exp nose/ OR Exp nose neoplasms/ OR Exp paranasal sinus neoplasms/ OR exp nasopharyngeal neoplasms/ OR nasopharyngeal.mp. OR nasopharynx\*.mp. or rhinopharynx\*.mp. OR sinus.mp. oR sinuses.mp. oR Sinonasal.mp. OR nasal.mp. OR nose.mp. OR ethmoid.mp. OR sphenoid.mp. OR paranasal.mp. OR intranasal.mp. OR septum.mp. OR septal.mp.

AND

(Exp squamous cell carcinoma/ OR SCC.mp. OR carcinoma\*.mp. OR squamous.mp.)

AND

(Exp survival/ OR exp "survival rate"/ OR exp mortality/ or follow-up.mp. or follow up.mp. oR Die.mp. oR died.mp. OR alive.mp. OR lived.mp. OR live.mp. OR retrospective\*.mp. OR surviv\*.mp. or mortality.mp. or death.mp. OR (recurrence adj2 (incidence OR rate)).mp. OR recurrent.mp.)

AND

(Exp inverted papilloma/ OR Papilloma.mp. OR papillomas.mp. OR papillomatosis.mp. OR papillomatoses.mp.)

OR

((((Paranasal OR nasal\* OR sinus OR sinuses OR nose OR sinonasal) adj5 (carcinoma\* OR squamous OR neoplasm\* OR cancer\*).mp.)

AND (papilloma\*.mp. OR papillary.mp. OR papillomatosis.mp. OR papillomatoses.mp.)) limit to yr="1946 - 1980" )

Date range – 1946 -1980

### Embase

241 results on 06/18/19

18 results on 01/23/20 with limit AND [18-6-2019]/sd NOT [24-1-2020]/sd

(‘nose’/exp OR ‘nose cancer’/exp OR ‘paranasal sinus cancer’/exp OR sinus:ti,ab,kw,de oR sinuses:ti,ab,kw,de oR Sinonasal:ti,ab,kw,de OR nasal:ti,ab,kw,de OR nose:ti,ab,kw,de OR ethmoid:ti,ab,kw,de OR sphenoid:ti,ab,kw,de OR paranasal:ti,ab,kw,de OR intranasal:ti,ab,kw,de OR septum:ti,ab,kw,de OR septal:ti,ab,kw,de) AND

(‘squamous cell carcinoma’/de OR ‘oropharynx squamous cell carcinoma’/exp OR ‘head and neck squamous cell carcinoma’/de OR ‘squamous cell carcinoma’:ti,ab,kw,de OR ‘squamous cell carcinomas’:ti,ab,kw,de)

AND

(‘survival’/exp OR ‘mortality’/exp or (follow\* near/1 up) oR Die:ti,ab,kw,de oR died:ti,ab,kw,de OR alive:ti,ab,kw,de OR lived:ti,ab,kw,de OR live:ti,ab,kw,de OR retrospective\*:ti,ab,kw,de OR surviv\*:ti,ab,kw,de or mortality:ti,ab,kw,de or death:ti,ab,kw,de OR (recurrence near/2 (incidence OR rate)):ti,ab,kw,de OR recurrent:ti,ab,kw,de)

AND

(‘inverted papilloma’/exp OR ((Papilloma OR papillomas OR papillomatosis OR papillomatoses) near/2 invert\*):ti,ab,kw,de)

## Scopus

245 results on 06/18/19

15 results on 01/23/20 with limit AND ( LIMIT-TO ( PUBYEAR , 2020 ) OR LIMIT-TO ( PUBYEAR , 2019 ) )

(( TITLE-ABS-KEY ( sinus ) ) OR ( TITLE-ABS-KEY ( sinuses ) ) OR ( TITLE-ABS-KEY ( sinonasal ) ) OR ( TITLE-ABS-KEY ( nasal ) ) OR ( TITLE-ABS-KEY ( nose ) ) OR ( TITLE-ABS-KEY ( ethmoid ) ) OR ( TITLE-ABS-KEY ( sphenoid ) ) OR ( TITLE-ABS-KEY ( paranasal ) ) OR ( TITLE-ABS-KEY ( intranasal ) ) OR ( TITLE-ABS-KEY ( septum ) ) OR ( TITLE-ABS-KEY ( septal ) ) ) AND ( ( TITLE-ABS-KEY ( "squamous cell carcinoma" ) ) OR ( TITLE-ABS-KEY ( "squamous cell carcinomas" ) ) ) AND ( ( TITLE-ABS-KEY ( follow\* W/1 up ) ) OR ( TITLE-ABS-KEY ( die ) ) OR ( TITLE-ABS-KEY ( died ) ) OR ( TITLE-ABS-KEY ( alive ) ) OR ( TITLE-ABS-KEY ( lived ) ) OR ( TITLE-ABS-KEY ( live ) ) OR ( TITLE-ABS-KEY ( retrospective\* ) ) OR ( TITLE-ABS-KEY ( surviv\* ) ) OR ( TITLE-ABS-KEY ( mortality ) ) OR ( TITLE-ABS-KEY ( death ) ) OR ( TITLE-ABS-KEY ( recurrence W/2 ( incidence OR rate ) ) ) OR ( TITLE-ABS-KEY ( recurrent ) ) ) AND ( ( TITLE-ABS-KEY ( invert\* W/3 ( papilloma OR papillomas OR papillomatosis OR papillomatoses ) ) ) ) )

## Cochrane Library

1 result in Cochrane Central Register of Controlled Trials on 06/18/19

0 results in Cochrane Database of Systematic Reviews on 06/18/19

0 results in Cochrane Central Register of Controlled Trials on 01/23/20

0 results in Cochrane Database of Systematic Reviews on 01/23/20 with limit Date added to CENTRAL trials database "The last 9 months"

( [mh nose] OR [mh "nose neoplasms"] OR [mh "paranasal sinus neoplasms"] OR sinus:ti,ab,kw OR sinuses:ti,ab,kw OR Sinonasal:ti,ab,kw OR nasal:ti,ab,kw OR nose:ti,ab,kw OR ethmoid:ti,ab,kw OR sphenoid:ti,ab,kw OR paranasal:ti,ab,kw OR intranasal:ti,ab,kw OR septum:ti,ab,kw OR septal:ti,ab,kw )

AND

( [mh "squamous cell carcinoma"] OR "squamous cell carcinoma":ti,ab,kw OR "squamous cell carcinomas":ti,ab,kw )

AND

( [mh survival] OR [mh mortality] OR [mh "survival rate"] OR ( follow\* near/1 up ):ti,ab,kw OR Die:ti,ab,kw OR died:ti,ab,kw OR alive:ti,ab,kw OR lived:ti,ab,kw OR live:ti,ab,kw OR retrospective\*:ti,ab,kw OR surviv\*:ti,ab,kw OR mortality:ti,ab,kw OR death:ti,ab,kw OR ( recurrence near/2 ( incidence OR rate ) ):ti,ab,kw OR recurrent:ti,ab,kw )

AND

( [mh "inverted papilloma"] OR ( Papilloma OR papillomas OR papillomatosis OR papillomatoses ) near/2 invert\* ):ti,ab,kw )

**eFigure 1.** Forest Plot of the Meta-Analysis of 5-Year Disease-Free Survival Rates Between dnSCC and IPSCC

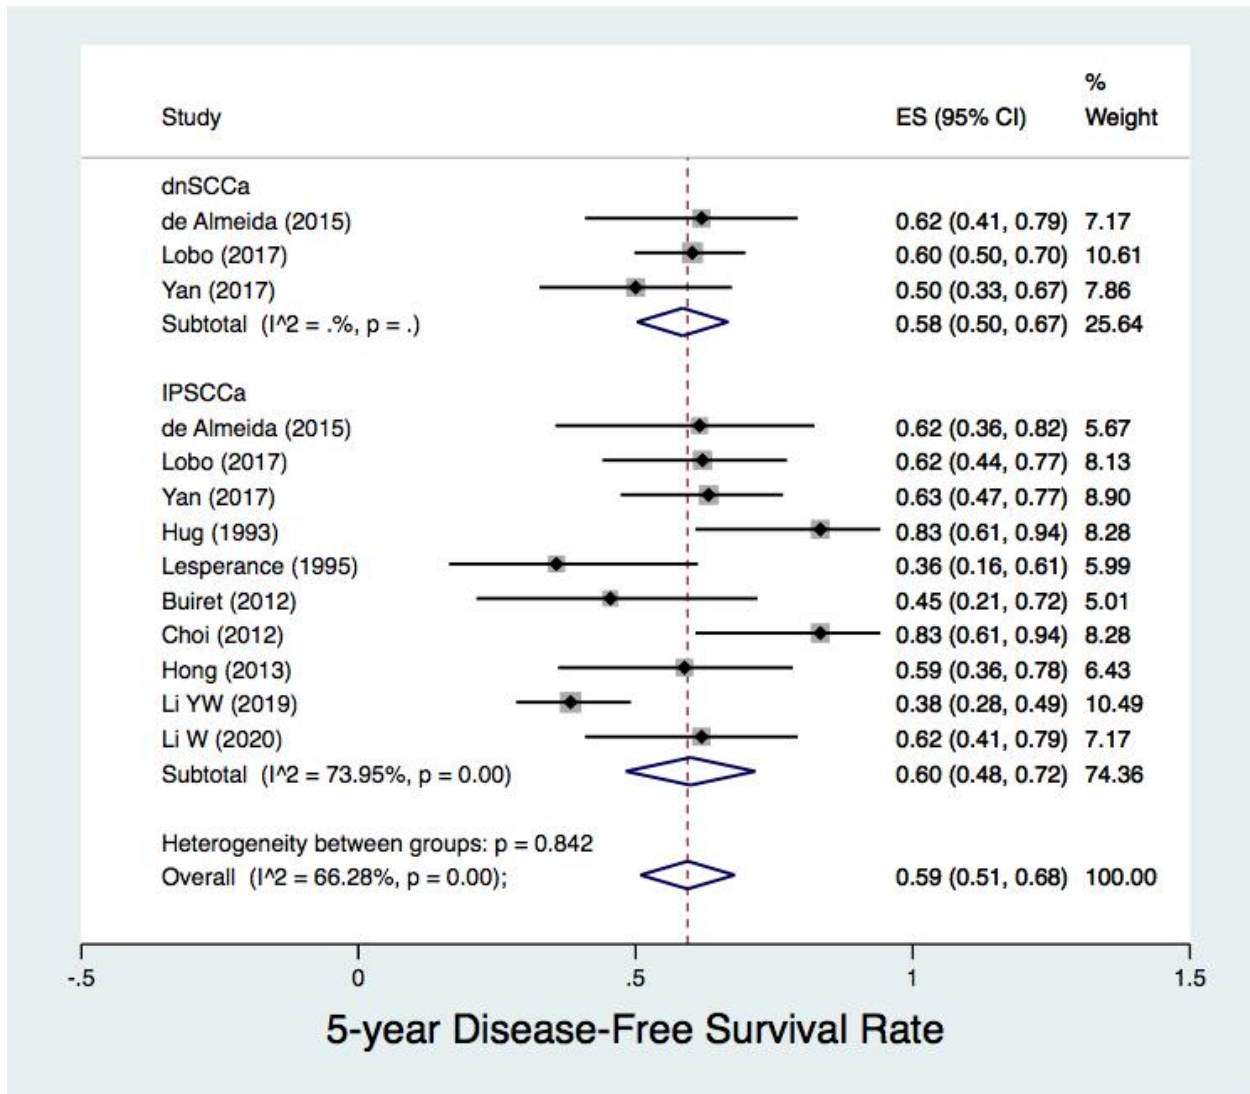

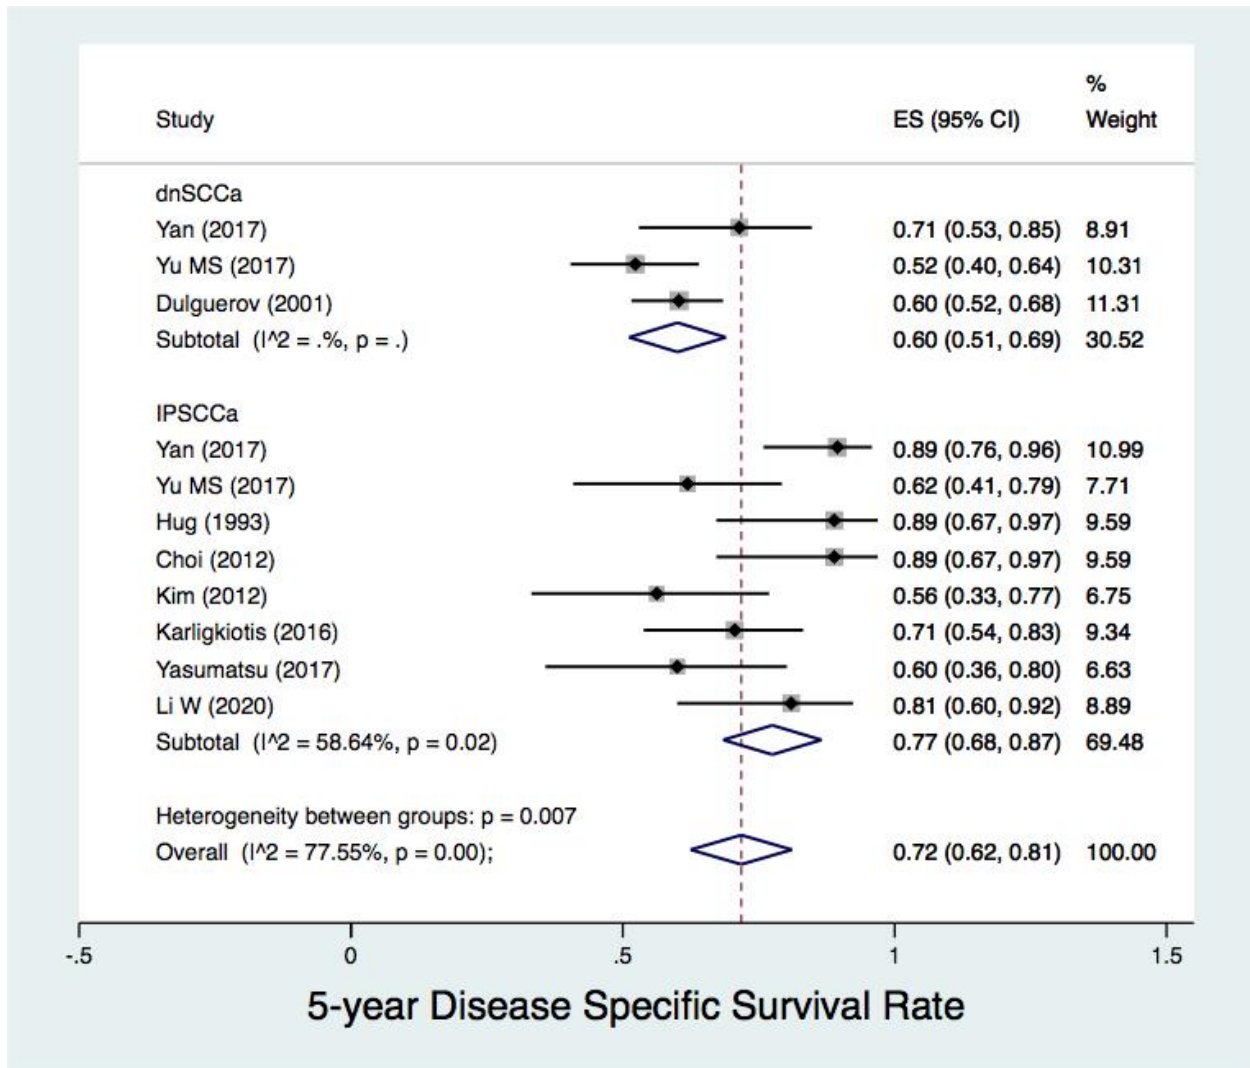

**eFigure 2.** Forest Plot of the Meta-Analysis of 5-Year Disease Specific Survival Rates Between dnSCCa and IPSCCa

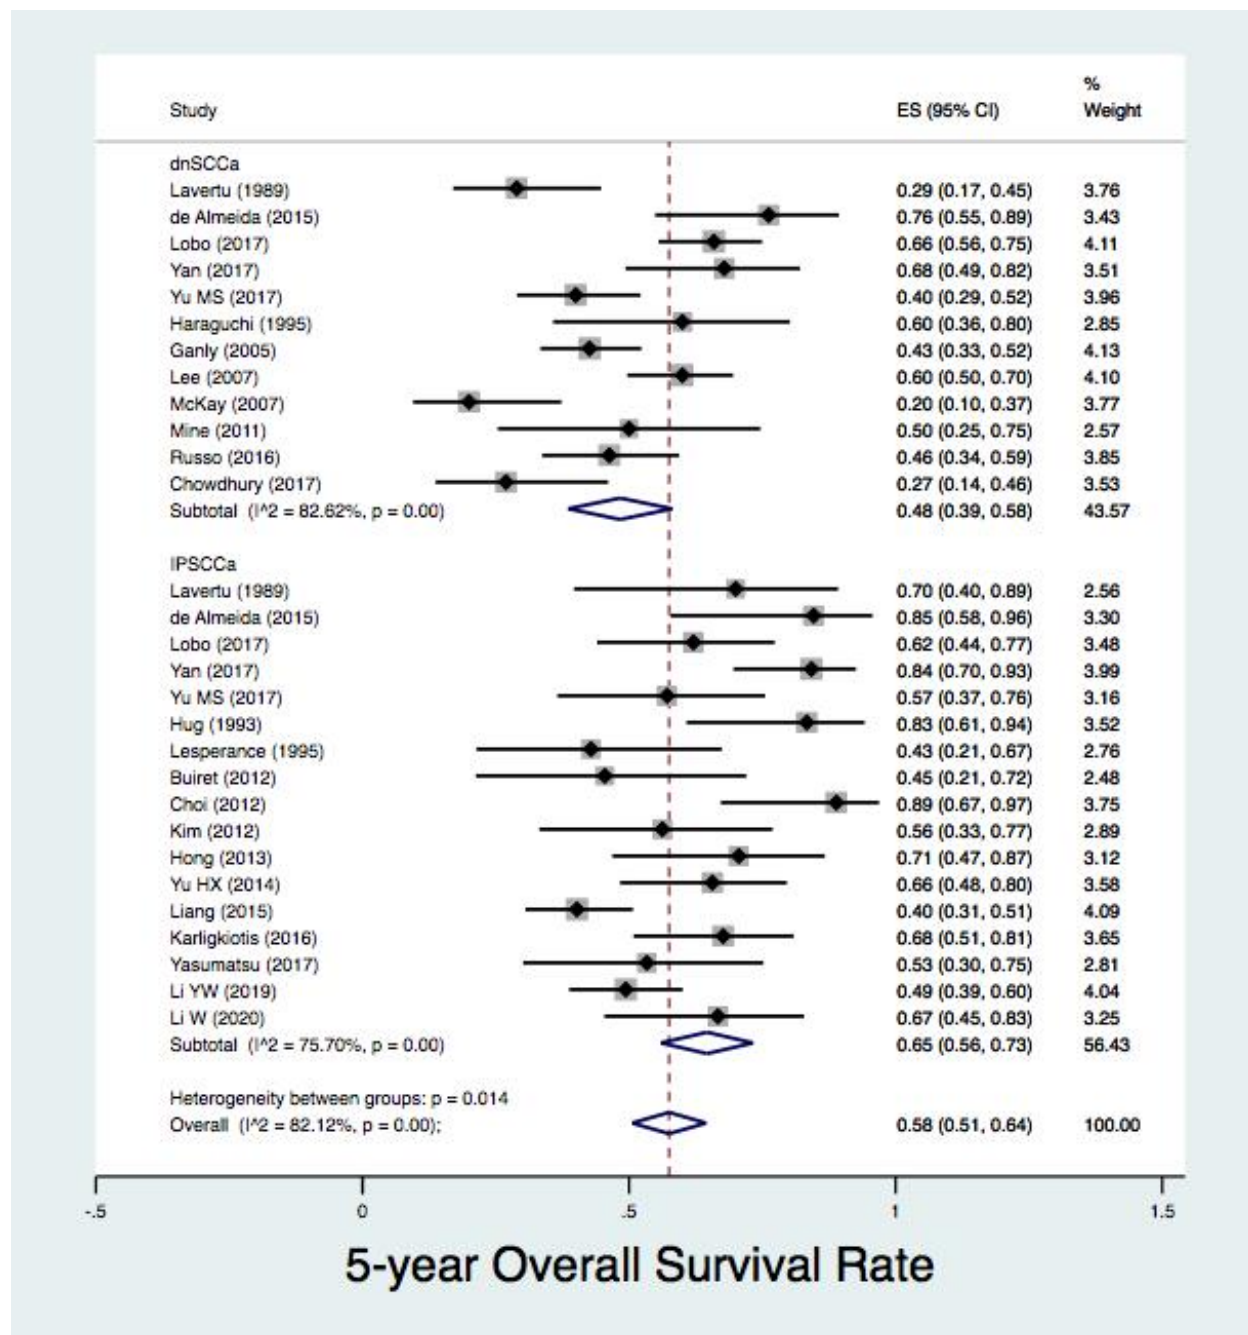

**eFigure 3.** Forest Plot of the Meta-Analysis of 5-Year Overall Survival Rates Between dnSCC and IPSCC When Including Studies That Did Not Explicitly Mention IP Status Into the De Novo Group



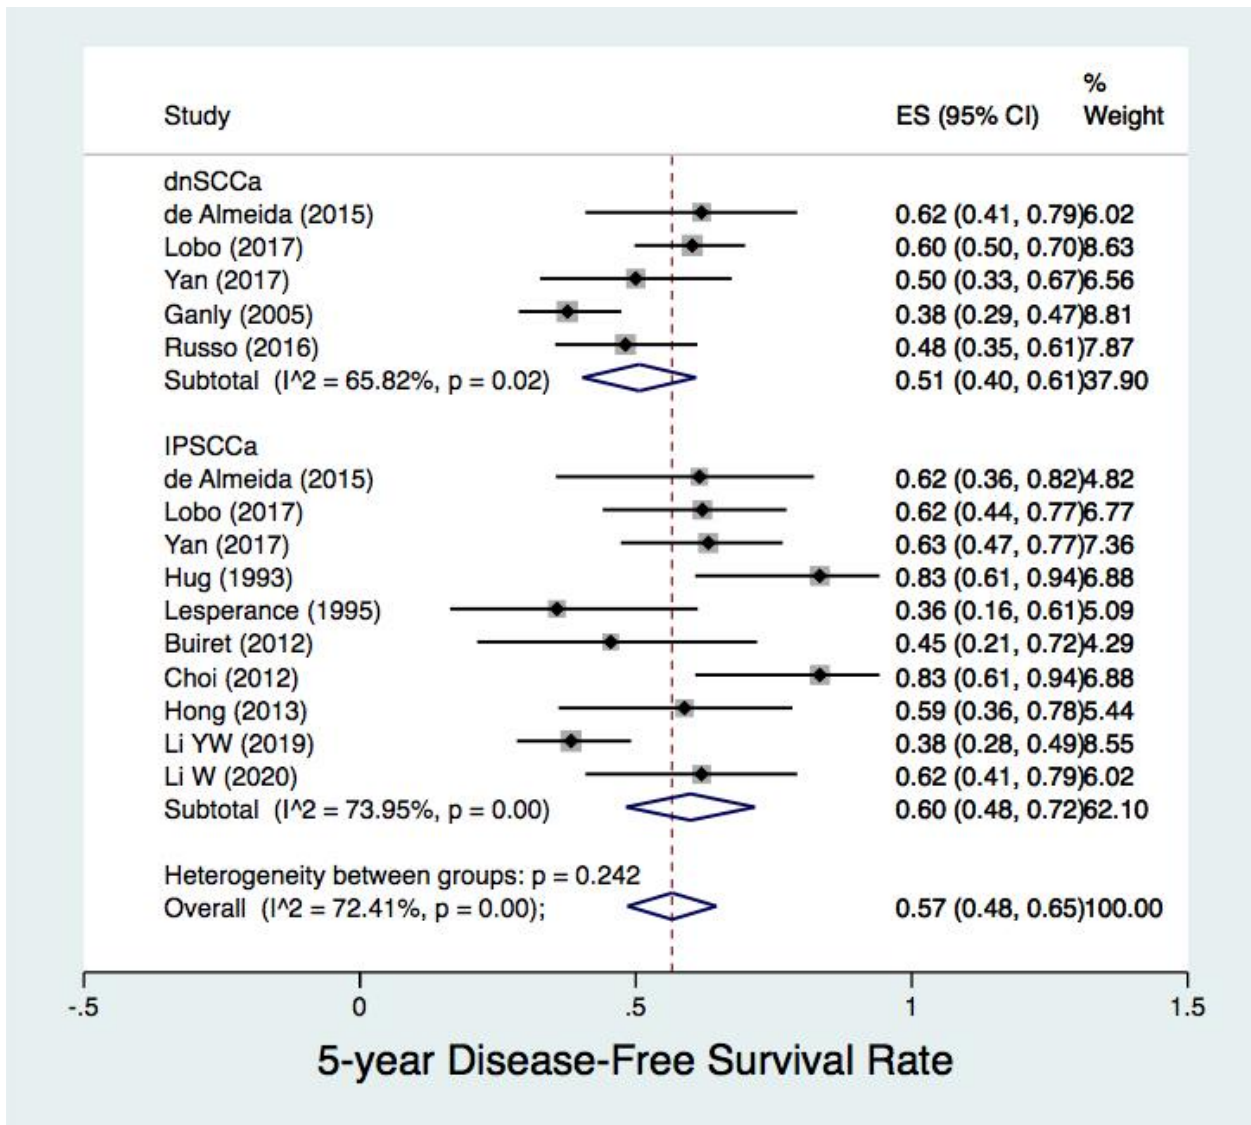

**eFigure 4.** Forest Plot of the Meta-Analysis of 5-Year Disease-Free Survival Rates Between dnSCC and IPSCC When Including Studies That Did Not Explicitly Mention IP Status Into the De Novo Group

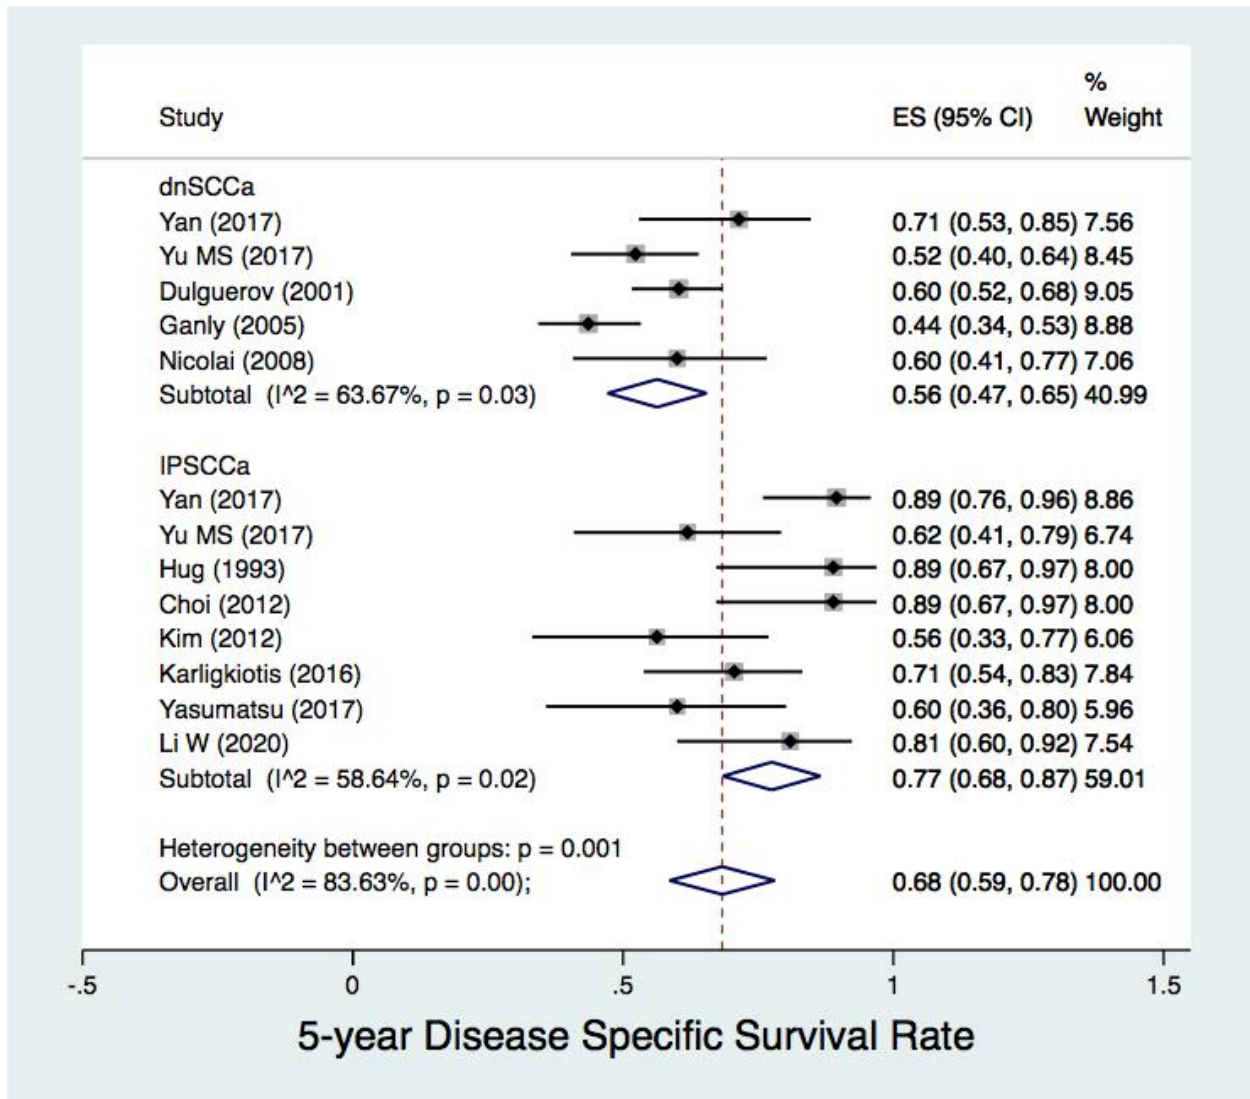

**eFigure 5.** Forest Plot of the Meta-Analysis of 5-Year Disease-Specific Survival Rates Between dnSCCa and IPSCCa When Including Studies That Did Not Explicitly Mention IP Status Into the De Novo Group

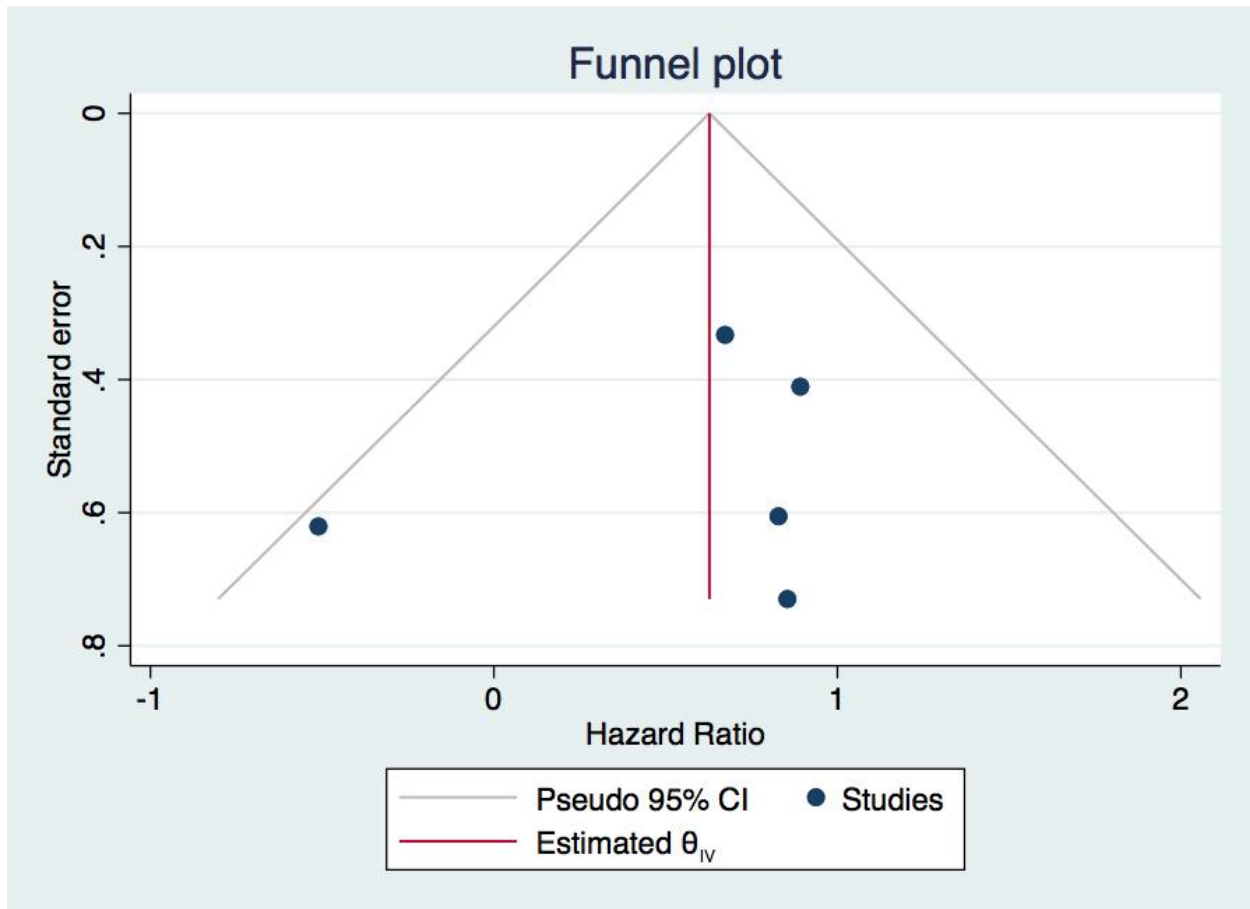

**eFigure 6.** Funnel Plot of the Included Studies in the Meta-Analysis With Logarithmic Function of the Hazard Ratio on the X-Axis and Standard Error on the Y-Axis
